# Supplementary material for: High-resolution analysis of selection sweeps identified between fine-wool Merino and coarse-wool Churra sheep breeds
Source: Genet Sel Evol. 2017 Nov 7;49:81. doi: 10.1186/s12711-017-0354-x (PMC5674817; doi:10.1186/s12711-017-0354-x)
Supplement: Supplementary file 21 — Additional file 21: Table S16. Characterization of the intragenic SNP variations identified, through the processing of the WGSeq datasets considered, within each of the 18 convergence candidate regions (CCR) identified according to the annotation performed with the eVEP software (ensembl Variant Effect Predictor; for further information about the column field names see http://www.ensembl.org/info/docs/tools/vep/vep_formats.html). [file 12711_2017_354_MOESM21_ESM.xlsx]

## Sheet: Additional file 21 Table S16
Additional file 21 for “High resolution analysis of selection sweeps identified between fine-wool Merino and coarse-wool Churra sheep breeds”
Authors: Beatriz Gutiérrez-Gil, Cristina Esteban-Blanco, Pamela Wiener, Praveen Krishna Chitneedi, Aroa Suarez-Vega, Juan-José Arranz
Additional file 21 Table S16. Characterization of the intragenic SNP variations identified, through the processing of the WGSeq datasets considered, within each of the 18 convergence candidate regions (CCR) identified according to the annotation performed with the eVEP software (ensembl Variant Effect Predictor; for further information about the column field names see http://www.ensembl.org/info/…
CCR	Chr	Pos	rsdb_SNPID	Ref	Alt	Gene	Orthologous through BLASTN	Consequence	Impact	Ensembl_ID	Transcript_ID	genomic_location	Exon number	Intron number	Position in cDNA	Position in CDS	Position in protein	Amino acid change	Codon change	rsdb_SNPID	Distance	STRAND	VARIANT_CLASS	SIFT	DOMAINS
CCR1	2	52105680	rs421342866	A	C	GLIPR2		upstream_gene_variant	MODIFIER	ENSOARG00000011628	ENSOART00000012646	protein_coding								rs421342866	1845	-1	SNV
2: 51658967-53837176	2	52106919	rs417192483	G	A	GLIPR2		upstream_gene_variant	MODIFIER	ENSOARG00000011628	ENSOART00000012646	protein_coding								rs417192483	3084	-1	SNV
	2	52113983	rs418253979	A	T			downstream_gene_variant	MODIFIER	ENSOARG00000011640	ENSOART00000012658	pseudogene								rs418253979	2045	-1	SNV
	2	52157542	rs406678139	G	A	RECK		intron_variant	MODIFIER	ENSOARG00000011660	ENSOART00000012688	protein_coding		10 out of 20						rs406678139		-1	SNV
	2	52200673	rs400044039	C	T	RECK		intron_variant	MODIFIER	ENSOARG00000011660	ENSOART00000012688	protein_coding		1 out 20						rs400044039		-1	SNV
	2	52220863	rs410895470	G	T	U6atac		downstream_gene_variant	MODIFIER	ENSOARG00000023699	ENSOART00000025601	snRNA								rs410895470	4246	1	SNV
	2	52264178	rs426894032	G	A		orthologous to human OR13C7	intron_variant	MODIFIER	ENSOARG00000011681	ENSOART00000012704	protein_coding		1 out of 1						rs426894032		1	SNV
	2	52264178	rs426894032	G	A		orthologous to human OR13C7	intron_variant	MODIFIER	ENSOARG00000011681	ENSOART00000012705	protein_coding		1 out of 1						rs426894032		1	SNV
	2	52264233	rs407375622	C	T		orthologous to human OR13C7	intron_variant	MODIFIER	ENSOARG00000011681	ENSOART00000012704	protein_coding		1 out of 1						rs407375622		1	SNV
	2	52264233	rs407375622	C	T		orthologous to human OR13C7	intron_variant	MODIFIER	ENSOARG00000011681	ENSOART00000012705	protein_coding		1 out of 1						rs407375622		1	SNV
	2	52265053	rs428585566	T	C		orthologous to human OR13C7	intron_variant	MODIFIER	ENSOARG00000011681	ENSOART00000012704	protein_coding		1 out of 1						rs428585566		1	SNV
	2	52265053	rs428585566	T	C		orthologous to human OR13C7	intron_variant	MODIFIER	ENSOARG00000011681	ENSOART00000012705	protein_coding		1 out of 1						rs428585566		1	SNV
	2	52268542	rs409943667	A	G		orthologous to human OR13C7	downstream_gene_variant	MODIFIER	ENSOARG00000011681	ENSOART00000012704	protein_coding								rs409943667	924	1	SNV
	2	52268542	rs409943667	A	G		orthologous to human OR13C7	intron_variant	MODIFIER	ENSOARG00000011681	ENSOART00000012705	protein_coding		1 out of 1						rs409943667		1	SNV
	2	52272907	rs417457423	T	C		orthologous to human OR13C7	intron_variant	MODIFIER	ENSOARG00000011681	ENSOART00000012705	protein_coding		1 out of 1						rs417457423		1	SNV
	2	52272937	rs430824931	C	A		orthologous to human OR13C7	intron_variant	MODIFIER	ENSOARG00000011681	ENSOART00000012705	protein_coding		1 out of 1						rs430824931		1	SNV
	2	52273705	rs418704485	A	G		orthologous to human OR13C7	intron_variant	MODIFIER	ENSOARG00000011681	ENSOART00000012705	protein_coding		1 out of 1						rs418704485		1	SNV
	2	52274193	rs414220946	C	T		orthologous to human OR13C7	intron_variant	MODIFIER	ENSOARG00000011681	ENSOART00000012705	protein_coding		1 out of 1						rs414220946		1	SNV
	2	52274820	rs414614417	A	G		orthologous to human OR13C7	intron_variant	MODIFIER	ENSOARG00000011681	ENSOART00000012705	protein_coding		1 out of 1						rs414614417		1	SNV
	2	52279539	rs412462155	C	T		orthologous to human OR13C7	downstream_gene_variant	MODIFIER	ENSOARG00000011681	ENSOART00000012705	protein_coding								rs412462155	3966	1	SNV
	2	52279539	rs412462155	C	T	5S_rRNA		upstream_gene_variant	MODIFIER	ENSOARG00000021245	ENSOART00000023147	rRNA								rs412462155	1589	1	SNV
	2	52280147	rs414257304	G	A		orthologous to human OR13C7	downstream_gene_variant	MODIFIER	ENSOARG00000011681	ENSOART00000012705	protein_coding								rs414257304	4574	1	SNV
	2	52280147	rs414257304	G	A	5S_rRNA		upstream_gene_variant	MODIFIER	ENSOARG00000021245	ENSOART00000023147	rRNA								rs414257304	981	1	SNV
	2	52280159	rs419520226	T	C		orthologous to human OR13C7	downstream_gene_variant	MODIFIER	ENSOARG00000011681	ENSOART00000012705	protein_coding								rs419520226	4586	1	SNV
	2	52280159	rs419520226	T	C	5S_rRNA		upstream_gene_variant	MODIFIER	ENSOARG00000021245	ENSOART00000023147	rRNA								rs419520226	969	1	SNV
	2	52281674	rs409145594	T	C	5S_rRNA		downstream_gene_variant	MODIFIER	ENSOARG00000021245	ENSOART00000023147	rRNA								rs409145594	431	1	SNV
	2	52383633	rs410846694	T	C	TMEM8B		downstream_gene_variant	MODIFIER	ENSOARG00000011701	ENSOART00000012726	protein_coding								rs410846694	540	-1	SNV
	2	52383633	rs410846694	T	C	TMEM8B		downstream_gene_variant	MODIFIER	ENSOARG00000011701	ENSOART00000012729	protein_coding								rs410846694	540	-1	SNV
	2	52384025	rs160159942	G	T	TMEM8B		downstream_gene_variant	MODIFIER	ENSOARG00000011701	ENSOART00000012726	protein_coding								rs160159942	148	-1	SNV
	2	52384025	rs160159942	G	T	TMEM8B		downstream_gene_variant	MODIFIER	ENSOARG00000011701	ENSOART00000012729	protein_coding								rs160159942	148	-1	SNV
	2	52389665	rs418461477	A	G	TMEM8B		intron_variant	MODIFIER	ENSOARG00000011701	ENSOART00000012726	protein_coding		01 out of 11 out of 2013						rs418461477		-1	SNV
	2	52389665	rs418461477	A	G	TMEM8B		intron_variant	MODIFIER	ENSOARG00000011701	ENSOART00000012729	protein_coding		10 out of 12						rs418461477		-1	SNV
	2	52429848	rs160159505	T	C	TMEM8B		intron_variant	MODIFIER	ENSOARG00000011701	ENSOART00000012726	protein_coding		1 out of 13						rs160159505		-1	SNV
	2	52429848	rs160159505	T	C	SPAG8		downstream_gene_variant	MODIFIER	ENSOARG00000011745	ENSOART00000012773	protein_coding								rs160159505	3373	1	SNV
	2	52429848	rs160159505	T	C	NPR2		missense_variant	MODERATE	ENSOARG00000011762	ENSOART00000012797	protein_coding	16 out of 22		3341	2540	847	H/R	cAc/cGc	rs160159505		-1	SNV	tolerated(1)	SMART_domains:SM00044
	2	52452297	rs426646718	A	G	TMEM8B		intron_variant	MODIFIER	ENSOARG00000011701	ENSOART00000012726	protein_coding		1 out of 13						rs426646718		-1	SNV
	2	52610851	rs419080799	G	A	CD72		downstream_gene_variant	MODIFIER	ENSOARG00000011957	ENSOART00000013006	protein_coding								rs419080799	3645	1	SNV
	2	52610851	rs419080799	G	A	TESK1		upstream_gene_variant	MODIFIER	ENSOARG00000011970	ENSOART00000013024	protein_coding								rs419080799	3005	-1	SNV
	2	52613525	rs422233761	A	G	FAM166B		upstream_gene_variant	MODIFIER	ENSOARG00000011985	ENSOART00000013036	protein_coding								rs422233761	3231	1	SNV
	2	52614665	rs430171378	G	A	FAM166B		upstream_gene_variant	MODIFIER	ENSOARG00000011985	ENSOART00000013036	protein_coding								rs430171378	2091	1	SNV
	2	52614665	rs430171378	G	A	RUSC2		downstream_gene_variant	MODIFIER	ENSOARG00000012003	ENSOART00000013055	protein_coding								rs430171378	4578	-1	SNV
	2	52615963	rs421683909	A	T	FAM166B		upstream_gene_variant	MODIFIER	ENSOARG00000011985	ENSOART00000013036	protein_coding								rs421683909	793	1	SNV
	2	52615963	rs421683909	A	T	RUSC2		downstream_gene_variant	MODIFIER	ENSOARG00000012003	ENSOART00000013055	protein_coding								rs421683909	3280	-1	SNV
	2	52617088	rs407928531	C	T	FAM166B		intron_variant	MODIFIER	ENSOARG00000011985	ENSOART00000013036	protein_coding		1 out of 5						rs407928531		1	SNV
	2	52617088	rs407928531	C	T	RUSC2		downstream_gene_variant	MODIFIER	ENSOARG00000012003	ENSOART00000013055	protein_coding								rs407928531	2155	-1	SNV
	2	52636216	rs417875058	T	G	RUSC2		upstream_gene_variant	MODIFIER	ENSOARG00000012003	ENSOART00000013055	protein_coding								rs417875058	3829	-1	SNV
	2	53149277	rs416287137	G	A	DNAJB5		upstream_gene_variant	MODIFIER	ENSOARG00000012228	ENSOART00000013295	protein_coding								rs416287137	2450	-1	SNV
	2	53149277	rs416287137	G	A	U6		upstream_gene_variant	MODIFIER	ENSOARG00000022166	ENSOART00000024068	snRNA								rs416287137	3782	1	SNV
	2	53150135	rs422210273	G	A	DNAJB5		upstream_gene_variant	MODIFIER	ENSOARG00000012228	ENSOART00000013295	protein_coding								rs422210273	3308	-1	SNV
	2	53150135	rs422210273	G	A	U6		upstream_gene_variant	MODIFIER	ENSOARG00000022166	ENSOART00000024068	snRNA								rs422210273	2924	1	SNV
	2	53152576	rs413003210	G	T	U6		upstream_gene_variant	MODIFIER	ENSOARG00000022166	ENSOART00000024068	snRNA								rs413003210	483	1	SNV
	2	53154140	rs428014824	G	A	U6		downstream_gene_variant	MODIFIER	ENSOARG00000022166	ENSOART00000024068	snRNA								rs428014824	975	1	SNV
	2	53157070	rs402043713	T	C	PHF24		downstream_gene_variant	MODIFIER	ENSOARG00000012239	ENSOART00000013309	protein_coding								rs402043713	2542	-1	SNV
	2	53157070	rs402043713	T	C	U6		downstream_gene_variant	MODIFIER	ENSOARG00000022166	ENSOART00000024068	snRNA								rs402043713	3905	1	SNV
	2	53160580	rs160156210	A	G	PHF24		synonymous_variant	LOW	ENSOARG00000012239	ENSOART00000013309	protein_coding	5 out of 7		874	874	292	L	Tta/Cta	rs160156210		-1	SNV		Low_complexity_(Seg):Seg
	2	53162220	rs430809051	C	T	PHF24		intron_variant	MODIFIER	ENSOARG00000012239	ENSOART00000013309	protein_coding		2 out of 6						rs430809051		-1	SNV
	2	53168327	rs425348202	G	C	PHF24		upstream_gene_variant	MODIFIER	ENSOARG00000012239	ENSOART00000013309	protein_coding								rs425348202	2864	-1	SNV
	2	53168353	rs406265833	G	C	PHF24		upstream_gene_variant	MODIFIER	ENSOARG00000012239	ENSOART00000013309	protein_coding								rs406265833	2890	-1	SNV
	2	53169431	rs400600205	T	C	PHF24		upstream_gene_variant	MODIFIER	ENSOARG00000012239	ENSOART00000013309	protein_coding								rs400600205	3968	-1	SNV
	2	53169876	rs425156991	T	C	PHF24		upstream_gene_variant	MODIFIER	ENSOARG00000012239	ENSOART00000013309	protein_coding								rs425156991	4413	-1	SNV
CCR4	3	153382213	rs400374820	C	T	HELB		intron_variant	MODIFIER	ENSOARG00000002661	ENSOART00000002887	protein_coding		7 out of 12						rs400374820		-1	SNV
3:152544998-153519437	3	153382276	rs422925158	A	G	HELB		intron_variant	MODIFIER	ENSOARG00000002661	ENSOART00000002887	protein_coding		7 out of 12						rs422925158		-1	SNV
	3	153382340	rs399529264	A	G	HELB		intron_variant	MODIFIER	ENSOARG00000002661	ENSOART00000002887	protein_coding		7 out of 12						rs399529264		-1	SNV
	3	153382370	rs412765453	C	A	HELB		intron_variant	MODIFIER	ENSOARG00000002661	ENSOART00000002887	protein_coding		7 out of 12						rs412765453		-1	SNV
	3	153382391	rs426044335	A	T	HELB		intron_variant	MODIFIER	ENSOARG00000002661	ENSOART00000002887	protein_coding		7 out of 12						rs426044335		-1	SNV
	3	153382575	rs402636778	G	A	HELB		intron_variant	MODIFIER	ENSOARG00000002661	ENSOART00000002887	protein_coding		7 out of 12						rs402636778		-1	SNV
	3	153382612	rs425352158	T	C	HELB		intron_variant	MODIFIER	ENSOARG00000002661	ENSOART00000002887	protein_coding		7 out of 12						rs425352158		-1	SNV
	3	153382613	rs405840848	G	C	HELB		intron_variant	MODIFIER	ENSOARG00000002661	ENSOART00000002887	protein_coding		7 out of 12						rs405840848		-1	SNV
	3	153382665	rs415266414	C	G	HELB		intron_variant	MODIFIER	ENSOARG00000002661	ENSOART00000002887	protein_coding		7 out of 12						rs415266414		-1	SNV
	3	153382920	rs421583085	G	A	HELB		intron_variant	MODIFIER	ENSOARG00000002661	ENSOART00000002887	protein_coding		7 out of 12						rs421583085		-1	SNV
	3	153383207	rs418643805	G	T	HELB		intron_variant	MODIFIER	ENSOARG00000002661	ENSOART00000002887	protein_coding		7 out of 12						rs418643805		-1	SNV
	3	153383597	rs425179988	C	T	HELB		intron_variant	MODIFIER	ENSOARG00000002661	ENSOART00000002887	protein_coding		7 out of 12						rs425179988		-1	SNV
	3	153383901	rs415022953	A	G	HELB		intron_variant	MODIFIER	ENSOARG00000002661	ENSOART00000002887	protein_coding		7 out of 12						rs415022953		-1	SNV
	3	153384108	rs417548609	C	G	HELB		intron_variant	MODIFIER	ENSOARG00000002661	ENSOART00000002887	protein_coding		7 out of 12						rs417548609		-1	SNV
	3	153385346	rs404843269	A	C	HELB		intron_variant	MODIFIER	ENSOARG00000002661	ENSOART00000002887	protein_coding		6 out of 12						rs404843269		-1	SNV
	3	153385362	rs414205027	A	G	HELB		intron_variant	MODIFIER	ENSOARG00000002661	ENSOART00000002887	protein_coding		6 out of 12						rs414205027		-1	SNV
	3	153403614	rs425675354	T	C	HELB		upstream_gene_variant	MODIFIER	ENSOARG00000002661	ENSOART00000002887	protein_coding								rs425675354	4321	-1	SNV
	3	153444413	rs411829997	T	C	IRAK3		3_prime_UTR_variant	MODIFIER	ENSOARG00000002799	ENSOART00000003033	protein_coding	11 out of 11		4664					rs411829997		-1	SNV
	3	153457750	rs161817890	A	G	IRAK3		intron_variant	MODIFIER	ENSOARG00000002799	ENSOART00000003033	protein_coding		7 out of 10						rs161817890		-1	SNV
	3	153458070	rs413896313	C	T	IRAK3		intron_variant	MODIFIER	ENSOARG00000002799	ENSOART00000003033	protein_coding		7 out of 10						rs413896313		-1	SNV
	3	153458139	rs403820979	C	T	IRAK3		intron_variant	MODIFIER	ENSOARG00000002799	ENSOART00000003033	protein_coding		7 out of 10						rs403820979		-1	SNV
	3	153458432	rs416166592	C	G	IRAK3		intron_variant	MODIFIER	ENSOARG00000002799	ENSOART00000003033	protein_coding		7 out of 10						rs416166592		-1	SNV
CCR5	3	154272615	rs428839368	A	T	MSRB3		intron_variant	MODIFIER	ENSOARG00000002947	ENSOART00000003193	protein_coding		5 out of 6						rs428839368		-1	SNV
3:154006814-154522600	3	154273781	rs409462545	T	C	MSRB3		intron_variant	MODIFIER	ENSOARG00000002947	ENSOART00000003193	protein_coding		5 out of 6						rs409462545		-1	SNV
	3	154478660	rs406756547	G	A	LEMD3		intron_variant	MODIFIER	ENSOARG00000003051	ENSOART00000003306	protein_coding		3 out of 14						rs406756547		-1	SNV
CCR6	3	154836677	rs418993483	A	G	TBC1D30		intron_variant	MODIFIER	ENSOARG00000003221	ENSOART00000003500	protein_coding		10 out of 13						rs418993483		-1	SNV
3:154638280-158339544	3	154836686	rs428546148	A	G	TBC1D30		intron_variant	MODIFIER	ENSOARG00000003221	ENSOART00000003500	protein_coding		10 out of 13						rs428546148		-1	SNV
	3	154836861	rs412031620	A	C	TBC1D30		intron_variant	MODIFIER	ENSOARG00000003221	ENSOART00000003500	protein_coding		10 out of 13						rs412031620		-1	SNV
	3	154838020	rs411453132	A	G	TBC1D30		intron_variant	MODIFIER	ENSOARG00000003221	ENSOART00000003500	protein_coding		10 out of 13						rs411453132		-1	SNV
	3	154839312	rs410374810	G	A	TBC1D30		intron_variant	MODIFIER	ENSOARG00000003221	ENSOART00000003500	protein_coding		10 out of 13						rs410374810		-1	SNV
	3	154839596	rs413892042	A	C	TBC1D30		intron_variant	MODIFIER	ENSOARG00000003221	ENSOART00000003500	protein_coding		10 out of 13						rs413892042		-1	SNV
	3	154839747	rs429299335	A	G	TBC1D30		intron_variant	MODIFIER	ENSOARG00000003221	ENSOART00000003500	protein_coding		10 out of 13						rs429299335		-1	SNV
	3	154839829	rs422550487	A	T	TBC1D30		intron_variant	MODIFIER	ENSOARG00000003221	ENSOART00000003500	protein_coding		10 out of 13						rs422550487		-1	SNV
	3	154839969	rs419032260	G	A	TBC1D30		intron_variant	MODIFIER	ENSOARG00000003221	ENSOART00000003500	protein_coding		10 out of 13						rs419032260		-1	SNV
	3	154840081	rs412764407	C	T	TBC1D30		intron_variant	MODIFIER	ENSOARG00000003221	ENSOART00000003500	protein_coding		10 out of 13						rs412764407		-1	SNV
	3	154840166	rs426110389	C	T	TBC1D30		intron_variant	MODIFIER	ENSOARG00000003221	ENSOART00000003500	protein_coding		10 out of 13						rs426110389		-1	SNV
	3	154840289	rs412107643	A	T	TBC1D30		intron_variant	MODIFIER	ENSOARG00000003221	ENSOART00000003500	protein_coding		10 out of 13						rs412107643		-1	SNV
	3	154840589	rs418405299	T	C	TBC1D30		intron_variant	MODIFIER	ENSOARG00000003221	ENSOART00000003500	protein_coding		10 out of 13						rs418405299		-1	SNV
	3	154840761	rs409437723	A	C	TBC1D30		intron_variant	MODIFIER	ENSOARG00000003221	ENSOART00000003500	protein_coding		10 out of 13						rs409437723		-1	SNV
	3	154840769	rs418758132	A	C	TBC1D30		intron_variant	MODIFIER	ENSOARG00000003221	ENSOART00000003500	protein_coding		10 out of 13						rs418758132		-1	SNV
	3	154840814	rs399579333	T	G	TBC1D30		intron_variant	MODIFIER	ENSOARG00000003221	ENSOART00000003500	protein_coding		10 out of 13						rs399579333		-1	SNV
	3	154840837	rs408842432	A	G	TBC1D30		intron_variant	MODIFIER	ENSOARG00000003221	ENSOART00000003500	protein_coding		10 out of 13						rs408842432		-1	SNV
	3	154840959	rs401956723	G	C	TBC1D30		intron_variant	MODIFIER	ENSOARG00000003221	ENSOART00000003500	protein_coding		10 out of 13						rs401956723		-1	SNV
	3	154841008	rs410952156	T	C	TBC1D30		intron_variant	MODIFIER	ENSOARG00000003221	ENSOART00000003500	protein_coding		10 out of 13						rs410952156		-1	SNV
	3	154841075	rs405173180	A	C	TBC1D30		intron_variant	MODIFIER	ENSOARG00000003221	ENSOART00000003500	protein_coding		10 out of 13						rs405173180		-1	SNV
	3	154841079	rs418515153	T	C	TBC1D30		intron_variant	MODIFIER	ENSOARG00000003221	ENSOART00000003500	protein_coding		10 out of 13						rs418515153		-1	SNV
	3	154841087	rs423661626	T	C	TBC1D30		intron_variant	MODIFIER	ENSOARG00000003221	ENSOART00000003500	protein_coding		10 out of 13						rs423661626		-1	SNV
	3	154841284	.	T	C	TBC1D30		intron_variant	MODIFIER	ENSOARG00000003221	ENSOART00000003500	protein_coding		10 out of 13						rs598869236		-1	SNV
	3	154841285	.	C	T	TBC1D30		intron_variant	MODIFIER	ENSOARG00000003221	ENSOART00000003500	protein_coding		10 out of 13						rs591946957		-1	SNV
	3	154841787	rs423728423	C	T	TBC1D30		intron_variant	MODIFIER	ENSOARG00000003221	ENSOART00000003500	protein_coding		10 out of 13						rs423728423		-1	SNV
	3	154842205	rs421008438	A	C	TBC1D30		intron_variant	MODIFIER	ENSOARG00000003221	ENSOART00000003500	protein_coding		10 out of 13						rs421008438		-1	SNV
	3	154842334	rs400928421	A	C	TBC1D30		intron_variant	MODIFIER	ENSOARG00000003221	ENSOART00000003500	protein_coding		10 out of 13						rs400928421		-1	SNV
	3	154842367	rs419018642	G	A	TBC1D30		intron_variant	MODIFIER	ENSOARG00000003221	ENSOART00000003500	protein_coding		10 out of 13						rs419018642		-1	SNV
	3	154844035	rs429165809	A	G	TBC1D30		intron_variant	MODIFIER	ENSOARG00000003221	ENSOART00000003500	protein_coding		10 out of 13						rs429165809		-1	SNV
	3	154844657	rs401990512	T	C	TBC1D30		intron_variant	MODIFIER	ENSOARG00000003221	ENSOART00000003500	protein_coding		9 out of 13						rs401990512		-1	SNV
	3	154845048	rs412457714	C	A	TBC1D30		intron_variant	MODIFIER	ENSOARG00000003221	ENSOART00000003500	protein_coding		9 out of 13						rs412457714		-1	SNV
	3	154845624	rs418169886	C	A	TBC1D30		intron_variant	MODIFIER	ENSOARG00000003221	ENSOART00000003500	protein_coding		9 out of 13						rs418169886		-1	SNV
	3	154845634	.	T	TG	TBC1D30		intron_variant	MODIFIER	ENSOARG00000003221	ENSOART00000003500	protein_coding		9 out of 13						rs604457525		-1	insertion
	3	154845671	rs427319712	A	G	TBC1D30		intron_variant	MODIFIER	ENSOARG00000003221	ENSOART00000003500	protein_coding		9 out of 13						rs427319712		-1	SNV
	3	154901883	rs410740237	C	T	TBC1D30		intron_variant	MODIFIER	ENSOARG00000003221	ENSOART00000003500	protein_coding		3 out of 13						rs410740237		-1	SNV
	3	155068974	rs402610670	T	C	RASSF3		intron_variant	MODIFIER	ENSOARG00000003339	ENSOART00000003622	protein_coding		1 out of 4						rs402610670		-1	SNV
	3	155071399	rs418341416	G	A	RASSF3		upstream_gene_variant	MODIFIER	ENSOARG00000003339	ENSOART00000003622	protein_coding								rs418341416	2240	-1	SNV
	3	155169508	.	G	A	TBK1		intron_variant	MODIFIER	ENSOARG00000003359	ENSOART00000003651	protein_coding		12 out of 19						rs589334924		-1	SNV
	3	155169512	.	T	C	TBK1		intron_variant	MODIFIER	ENSOARG00000003359	ENSOART00000003651	protein_coding		12 out of 19						rs600938628		-1	SNV
	3	155172012	rs411275736	C	T	TBK1		intron_variant	MODIFIER	ENSOARG00000003359	ENSOART00000003651	protein_coding		11 out of 19						rs411275736		-1	SNV
	3	155172024	rs424692217	C	T	TBK1		intron_variant	MODIFIER	ENSOARG00000003359	ENSOART00000003651	protein_coding		11 out of 19						rs424692217		-1	SNV
	3	155172161	rs405041234	G	C	TBK1		intron_variant	MODIFIER	ENSOARG00000003359	ENSOART00000003651	protein_coding		11 out of 19						rs405041234		-1	SNV
	3	155498951	rs401183873	T	C	SRGAP1		intron_variant	MODIFIER	ENSOARG00000003915	ENSOART00000004261	protein_coding		16 out of 20						rs401183873		-1	SNV
	3	155498951	rs401183873	T	C	SRGAP1		intron_variant	MODIFIER	ENSOARG00000003915	ENSOART00000004259	protein_coding		16 out of 22						rs401183873		-1	SNV
	3	155513350	rs399843667	C	T	SRGAP1		intron_variant	MODIFIER	ENSOARG00000003915	ENSOART00000004261	protein_coding		14 out of 20						rs399843667		-1	SNV
	3	155513350	rs399843667	C	T	SRGAP1		intron_variant	MODIFIER	ENSOARG00000003915	ENSOART00000004259	protein_coding		14 out of 22						rs399843667		-1	SNV
	3	155577108	rs415998699	C	A	SRGAP1		intron_variant	MODIFIER	ENSOARG00000003915	ENSOART00000004261	protein_coding		4 out of 20						rs415998699		-1	SNV
	3	155577108	rs415998699	C	A	SRGAP1		intron_variant	MODIFIER	ENSOARG00000003915	ENSOART00000004259	protein_coding		4 out of 22						rs415998699		-1	SNV
	3	155577485	rs412033971	A	G	SRGAP1		intron_variant	MODIFIER	ENSOARG00000003915	ENSOART00000004261	protein_coding		4 out of 20						rs412033971		-1	SNV
	3	155577485	rs412033971	A	G	SRGAP1		intron_variant	MODIFIER	ENSOARG00000003915	ENSOART00000004259	protein_coding		4 out of 22						rs412033971		-1	SNV
	3	156582949	rs418732625	T	C	PPM1H		intron_variant	MODIFIER	ENSOARG00000004219	ENSOART00000004591	protein_coding		1 out of 9						rs418732625		1	SNV
	3	156583042	rs412612720	C	T	PPM1H		intron_variant	MODIFIER	ENSOARG00000004219	ENSOART00000004591	protein_coding		1 out of 9						rs412612720		1	SNV
	3	156583134	rs426654932	C	A	PPM1H		intron_variant	MODIFIER	ENSOARG00000004219	ENSOART00000004591	protein_coding		1 out of 9						rs426654932		1	SNV
	3	156583138	rs399010122	A	T	PPM1H		intron_variant	MODIFIER	ENSOARG00000004219	ENSOART00000004591	protein_coding		1 out of 9						rs399010122		1	SNV
	3	156712997	rs410023755	A	G	PPM1H		intron_variant	MODIFIER	ENSOARG00000004219	ENSOART00000004591	protein_coding		5 out of 9						rs410023755		1	SNV
CCR11	6	36566592	rs159957132	C	T	PKD2		synonymous_variant	LOW	ENSOARG00000002335	ENSOART00000002531	protein_coding	16 out of 16		2178	2178	726	L	ctG/ctA	rs159957132		-1	SNV
6:36461468-36914376	6	36572923	rs398808394	T	C	PKD2		intron_variant	MODIFIER	ENSOARG00000002335	ENSOART00000002531	protein_coding		11 out of 15						rs398808394		-1	SNV
	6	36623126	rs403438740	C	G	PKD2		intron_variant	MODIFIER	ENSOARG00000002335	ENSOART00000002531	protein_coding		2 out of 15						rs403438740		-1	SNV
	6	36627517	rs418068798	A	G	PKD2		intron_variant	MODIFIER	ENSOARG00000002335	ENSOART00000002531	protein_coding		2 out of 15						rs418068798		-1	SNV
	6	36801353	.	C	G	MEPE		downstream_gene_variant	MODIFIER	ENSOARG00000002865	ENSOART00000003099	protein_coding								rs591844999	3595	-1	SNV
	6	36802158	rs408140330	G	A	MEPE		downstream_gene_variant	MODIFIER	ENSOARG00000002865	ENSOART00000003099	protein_coding								rs408140330	2790	-1	SNV
	6	36803533	rs426115986	A	G	MEPE		downstream_gene_variant	MODIFIER	ENSOARG00000002865	ENSOART00000003099	protein_coding								rs426115986	1415	-1	SNV
	6	36803575	rs402342239	A	C	MEPE		downstream_gene_variant	MODIFIER	ENSOARG00000002865	ENSOART00000003099	protein_coding								rs402342239	1373	-1	SNV
	6	36804414	rs412891076	A	C	MEPE		downstream_gene_variant	MODIFIER	ENSOARG00000002865	ENSOART00000003099	protein_coding								rs412891076	534	-1	SNV
	6	36806944	.	A	C	MEPE		intron_variant	MODIFIER	ENSOARG00000002865	ENSOART00000003099	protein_coding		1 out of 1								-1	SNV
	6	36807924	rs422279768	A	G	MEPE		intron_variant	MODIFIER	ENSOARG00000002865	ENSOART00000003099	protein_coding		1 out of 1						rs422279768		-1	SNV
	6	36808445	rs420695533	A	G	MEPE		intron_variant	MODIFIER	ENSOARG00000002865	ENSOART00000003099	protein_coding		1 out of 1						rs420695533		-1	SNV
	6	36809566	rs401478990	G	C	MEPE		intron_variant	MODIFIER	ENSOARG00000002865	ENSOART00000003099	protein_coding		1 out of 1						rs401478990		-1	SNV
	6	36809749	rs400349519	A	G	MEPE		intron_variant	MODIFIER	ENSOARG00000002865	ENSOART00000003099	protein_coding		1 out of 1						rs400349519		-1	SNV
	6	36810026	rs406269314	C	T	MEPE		intron_variant	MODIFIER	ENSOARG00000002865	ENSOART00000003099	protein_coding		1 out of 1						rs406269314		-1	SNV
	6	36810085	rs424590340	T	C	MEPE		intron_variant	MODIFIER	ENSOARG00000002865	ENSOART00000003099	protein_coding		1 out of 1						rs424590340		-1	SNV
	6	36810128	rs404892020	G	T	MEPE		intron_variant	MODIFIER	ENSOARG00000002865	ENSOART00000003099	protein_coding		1 out of 1						rs404892020		-1	SNV
	6	36810559	rs407920429	A	G	MEPE		intron_variant	MODIFIER	ENSOARG00000002865	ENSOART00000003099	protein_coding		1 out of 1						rs407920429		-1	SNV
	6	36810596	rs417104520	T	C	MEPE		intron_variant	MODIFIER	ENSOARG00000002865	ENSOART00000003099	protein_coding		1 out of 1						rs417104520		-1	SNV
	6	36811238	rs425707356	C	T	MEPE		intron_variant	MODIFIER	ENSOARG00000002865	ENSOART00000003099	protein_coding		1 out of 1						rs425707356		-1	SNV
	6	36811481	rs411347104	A	G	MEPE		intron_variant	MODIFIER	ENSOARG00000002865	ENSOART00000003099	protein_coding		1 out of 1						rs411347104		-1	SNV
	6	36812338	rs402614466	G	A	MEPE		upstream_gene_variant	MODIFIER	ENSOARG00000002865	ENSOART00000003099	protein_coding								rs402614466	389	-1	SNV
	6	36812865	rs418756420	C	A	MEPE		upstream_gene_variant	MODIFIER	ENSOARG00000002865	ENSOART00000003099	protein_coding								rs418756420	916	-1	SNV
	6	36813827	rs413124673	A	G	MEPE		upstream_gene_variant	MODIFIER	ENSOARG00000002865	ENSOART00000003099	protein_coding								rs413124673	1878	-1	SNV
	6	36813878	.	A	C	MEPE		upstream_gene_variant	MODIFIER	ENSOARG00000002865	ENSOART00000003099	protein_coding									1929	-1	SNV
	6	36813951	rs426288310	A	G	MEPE		upstream_gene_variant	MODIFIER	ENSOARG00000002865	ENSOART00000003099	protein_coding								rs426288310	2002	-1	SNV
	6	36813967	rs402823251	C	T	MEPE		upstream_gene_variant	MODIFIER	ENSOARG00000002865	ENSOART00000003099	protein_coding								rs402823251	2018	-1	SNV
	6	36814149	rs416148335	C	T	MEPE		upstream_gene_variant	MODIFIER	ENSOARG00000002865	ENSOART00000003099	protein_coding								rs416148335	2200	-1	SNV
	6	36814981	rs401117186	G	T	MEPE		upstream_gene_variant	MODIFIER	ENSOARG00000002865	ENSOART00000003099	protein_coding								rs401117186	3032	-1	SNV
	6	36814991	rs414463317	G	T	MEPE		upstream_gene_variant	MODIFIER	ENSOARG00000002865	ENSOART00000003099	protein_coding								rs414463317	3042	-1	SNV
	6	36815145	rs413121395	T	C	MEPE		upstream_gene_variant	MODIFIER	ENSOARG00000002865	ENSOART00000003099	protein_coding								rs413121395	3196	-1	SNV
	6	36816255	rs426930842	C	T	MEPE		upstream_gene_variant	MODIFIER	ENSOARG00000002865	ENSOART00000003099	protein_coding								rs426930842	4306	-1	SNV
	6	36816485	rs429843715	T	C	MEPE		upstream_gene_variant	MODIFIER	ENSOARG00000002865	ENSOART00000003099	protein_coding								rs429843715	4536	-1	SNV
	6	36816886	rs400123778	T	C	MEPE		upstream_gene_variant	MODIFIER	ENSOARG00000002865	ENSOART00000003099	protein_coding								rs400123778	4937	-1	SNV
	6	36836691	.	A	T	IBSP		downstream_gene_variant	MODIFIER	ENSOARG00000002944	ENSOART00000003191	protein_coding								rs598634230	1156	-1	SNV
	6	36836691	.	A	T	IBSP		downstream_gene_variant	MODIFIER	ENSOARG00000002944	ENSOART00000003188	protein_coding								rs598634230	1156	-1	SNV
	6	36841486	rs411625162	G	A	IBSP		intron_variant	MODIFIER	ENSOARG00000002944	ENSOART00000003191	protein_coding		4 out of 5						rs411625162		-1	SNV
	6	36841486	rs411625162	G	A	IBSP		intron_variant	MODIFIER	ENSOARG00000002944	ENSOART00000003188	protein_coding		3 out of 4						rs411625162		-1	SNV
	6	36848644	rs411266536	T	G	IBSP		upstream_gene_variant	MODIFIER	ENSOARG00000002944	ENSOART00000003191	protein_coding								rs411266536	162	-1	SNV
	6	36848644	rs411266536	T	G	IBSP		upstream_gene_variant	MODIFIER	ENSOARG00000002944	ENSOART00000003188	protein_coding								rs411266536	162	-1	SNV
	6	36865411	rs401036560	C	T		orthologous to cattle TPI1	downstream_gene_variant	MODIFIER	ENSOARG00000003075	ENSOART00000003333	pseudogene								rs401036560	674	-1	SNV
	6	36865491	rs414444969	T	G		orthologous to cattle TPI1	downstream_gene_variant	MODIFIER	ENSOARG00000003075	ENSOART00000003333	pseudogene								rs414444969	594	-1	SNV
	6	36865528	rs404036564	A	G		orthologous to cattle TPI1	downstream_gene_variant	MODIFIER	ENSOARG00000003075	ENSOART00000003333	pseudogene								rs404036564	557	-1	SNV
	6	36865620	rs426444973	T	A		orthologous to cattle TPI1	downstream_gene_variant	MODIFIER	ENSOARG00000003075	ENSOART00000003333	pseudogene								rs426444973	465	-1	SNV
	6	36866916	rs416664916	A	G		orthologous to cattle TPI1	upstream_gene_variant	MODIFIER	ENSOARG00000003075	ENSOART00000003333	pseudogene								rs416664916	71	-1	SNV
	6	36867115	rs409316447	C	T		orthologous to cattle TPI1	upstream_gene_variant	MODIFIER	ENSOARG00000003075	ENSOART00000003333	pseudogene								rs409316447	270	-1	SNV
	6	36867238	rs425248713	C	A		orthologous to cattle TPI1	upstream_gene_variant	MODIFIER	ENSOARG00000003075	ENSOART00000003333	pseudogene								rs425248713	393	-1	SNV
	6	36868420	rs412680126	T	C		orthologous to cattle TPI1	upstream_gene_variant	MODIFIER	ENSOARG00000003075	ENSOART00000003333	pseudogene								rs412680126	1575	-1	SNV
	6	36868441	rs426174030	G	A		orthologous to cattle TPI1	upstream_gene_variant	MODIFIER	ENSOARG00000003075	ENSOART00000003333	pseudogene								rs426174030	1596	-1	SNV
	6	36870490	rs414474344	G	A		orthologous to cattle TPI1	upstream_gene_variant	MODIFIER	ENSOARG00000003075	ENSOART00000003333	pseudogene								rs414474344	3645	-1	SNV
CCR12	6	37165524	rs408778635	T	C	FAM184B		intron_variant	MODIFIER	ENSOARG00000003736	ENSOART00000004062	protein_coding		12 out of 23						rs408778635		-1	SNV
6:37164263-38580198	6	37166642	rs403208602	T	C	FAM184B		intron_variant	MODIFIER	ENSOARG00000003736	ENSOART00000004062	protein_coding		12 out of 23						rs403208602		-1	SNV
	6	37174603	rs409571871	C	A	FAM184B		intron_variant	MODIFIER	ENSOARG00000003736	ENSOART00000004062	protein_coding		11 out of 23						rs409571871		-1	SNV
	6	37180170	rs410652078	G	T	FAM184B		intron_variant	MODIFIER	ENSOARG00000003736	ENSOART00000004062	protein_coding		10 out of 23						rs410652078		-1	SNV
	6	37199638	rs417946943	G	T	FAM184B		intron_variant	MODIFIER	ENSOARG00000003736	ENSOART00000004062	protein_coding		4 out of 23						rs417946943		-1	SNV
	6	37203761	rs421650255	T	C	FAM184B		intron_variant	MODIFIER	ENSOARG00000003736	ENSOART00000004062	protein_coding		4 out of 23						rs421650255		-1	SNV
	6	37204096	.	T	A	FAM184B		intron_variant	MODIFIER	ENSOARG00000003736	ENSOART00000004062	protein_coding		4 out of 23								-1	SNV
	6	37204832	rs417644619	T	G	FAM184B		intron_variant	MODIFIER	ENSOARG00000003736	ENSOART00000004062	protein_coding		4 out of 23						rs417644619		-1	SNV
	6	37205131	rs429609027	C	T	FAM184B		intron_variant	MODIFIER	ENSOARG00000003736	ENSOART00000004062	protein_coding		4 out of 23						rs429609027		-1	SNV
	6	37205773	.	G	T	FAM184B		intron_variant	MODIFIER	ENSOARG00000003736	ENSOART00000004062	protein_coding		4 out of 23								-1	SNV
	6	37207790	rs420828675	C	A	FAM184B		intron_variant	MODIFIER	ENSOARG00000003736	ENSOART00000004062	protein_coding		4 out of 23						rs420828675		-1	SNV
	6	37208217	rs410642476	G	C	FAM184B		intron_variant	MODIFIER	ENSOARG00000003736	ENSOART00000004062	protein_coding		4 out of 23						rs410642476		-1	SNV
	6	37213754	rs424515884	C	T	FAM184B		intron_variant	MODIFIER	ENSOARG00000003736	ENSOART00000004062	protein_coding		4 out of 23						rs424515884		-1	SNV
	6	37215463	rs418968194	C	T	FAM184B		intron_variant	MODIFIER	ENSOARG00000003736	ENSOART00000004062	protein_coding		4 out of 23						rs418968194		-1	SNV
	6	37216893	rs417306602	T	C	FAM184B		intron_variant	MODIFIER	ENSOARG00000003736	ENSOART00000004062	protein_coding		4 out of 23						rs417306602		-1	SNV
	6	37217834	rs409871831	T	C	FAM184B		intron_variant	MODIFIER	ENSOARG00000003736	ENSOART00000004062	protein_coding		4 out of 23						rs409871831		-1	SNV
	6	37224932	rs408354474	T	C	FAM184B		intron_variant	MODIFIER	ENSOARG00000003736	ENSOART00000004062	protein_coding		4 out of 23						rs408354474		-1	SNV
	6	37230326	.	T	G	FAM184B		intron_variant	MODIFIER	ENSOARG00000003736	ENSOART00000004062	protein_coding		4 out of 23						rs604656302		-1	SNV
	6	37233061	rs402171545	A	G	FAM184B		intron_variant	MODIFIER	ENSOARG00000003736	ENSOART00000004062	protein_coding		4 out of 23						rs402171545		-1	SNV
	6	37234069	rs403767661	G	T	FAM184B		intron_variant	MODIFIER	ENSOARG00000003736	ENSOART00000004062	protein_coding		4 out of 23						rs403767661		-1	SNV
	6	37235215	rs408365499	G	A	FAM184B		intron_variant	MODIFIER	ENSOARG00000003736	ENSOART00000004062	protein_coding		4 out of 23						rs408365499		-1	SNV
	6	37235447	rs421828893	T	G	FAM184B		intron_variant	MODIFIER	ENSOARG00000003736	ENSOART00000004062	protein_coding		4 out of 23						rs421828893		-1	SNV
	6	37236177	rs417091326	G	A	FAM184B		intron_variant	MODIFIER	ENSOARG00000003736	ENSOART00000004062	protein_coding		4 out of 23						rs417091326		-1	SNV
	6	37240989	rs428815237	T	G	FAM184B		intron_variant	MODIFIER	ENSOARG00000003736	ENSOART00000004062	protein_coding		4 out of 23						rs428815237		-1	SNV
	6	37246197	rs404225306	T	C	FAM184B		intron_variant	MODIFIER	ENSOARG00000003736	ENSOART00000004062	protein_coding		4 out of 23						rs404225306		-1	SNV
	6	37247363	rs419262576	G	A	FAM184B		intron_variant	MODIFIER	ENSOARG00000003736	ENSOART00000004062	protein_coding		4 out of 23						rs419262576		-1	SNV
	6	37255639	rs411215144	T	A	FAM184B		intron_variant	MODIFIER	ENSOARG00000003736	ENSOART00000004062	protein_coding		4 out of 23						rs411215144		-1	SNV
	6	37255639	rs411215144	T	A	NCAPG		upstream_gene_variant	MODIFIER	ENSOARG00000004016	ENSOART00000004369	protein_coding								rs411215144	909	1	SNV
	6	37255854	rs400842494	G	A	FAM184B		intron_variant	MODIFIER	ENSOARG00000003736	ENSOART00000004062	protein_coding		4 out of 23						rs400842494		-1	SNV
	6	37255854	rs400842494	G	A	NCAPG		upstream_gene_variant	MODIFIER	ENSOARG00000004016	ENSOART00000004369	protein_coding								rs400842494	694	1	SNV
	6	37256030	.	CA	C	FAM184B		intron_variant	MODIFIER	ENSOARG00000003736	ENSOART00000004062	protein_coding		4 out of 23						rs593606912		-1	deletion
	6	37256030	.	CA	C	NCAPG		upstream_gene_variant	MODIFIER	ENSOARG00000004016	ENSOART00000004369	protein_coding								rs593606912	517	1	deletion
	6	37256712	rs413011848	T	G	FAM184B		intron_variant	MODIFIER	ENSOARG00000003736	ENSOART00000004062	protein_coding		4 out of 23						rs413011848		-1	SNV
	6	37256712	rs413011848	T	G	NCAPG		intron_variant	MODIFIER	ENSOARG00000004016	ENSOART00000004369	protein_coding		1 out of 20						rs413011848		1	SNV
	6	37257219	.	C	T	FAM184B		synonymous_variant	LOW	ENSOARG00000003736	ENSOART00000004062	protein_coding	4 out of 24		408	408	136	R	agG/agA	rs603206485		-1	SNV		Low_complexity_(Seg):Seg
	6	37257219	.	C	T	NCAPG		intron_variant	MODIFIER	ENSOARG00000004016	ENSOART00000004369	protein_coding		1 out of 20						rs603206485		1	SNV
	6	37257975	.	GA	G	FAM184B		upstream_gene_variant	MODIFIER	ENSOARG00000003736	ENSOART00000004062	protein_coding								rs603228672	220	-1	deletion
	6	37257975	.	GA	G	NCAPG		intron_variant	MODIFIER	ENSOARG00000004016	ENSOART00000004369	protein_coding		1 out of 20						rs603228672		1	deletion
	6	37263183	rs424048364	C	T	NCAPG		intron_variant	MODIFIER	ENSOARG00000004016	ENSOART00000004369	protein_coding		1 out of 20						rs424048364		1	SNV
	6	37267571	rs406912117	G	A	NCAPG		intron_variant	MODIFIER	ENSOARG00000004016	ENSOART00000004369	protein_coding		1 out of 20						rs406912117		1	SNV
	6	37270654	rs159957861	G	T	NCAPG		intron_variant	MODIFIER	ENSOARG00000004016	ENSOART00000004369	protein_coding		1 out of 20						rs159957861		1	SNV
	6	37273147	rs406364088	A	G	NCAPG		intron_variant	MODIFIER	ENSOARG00000004016	ENSOART00000004369	protein_coding		1 out of 20						rs406364088		1	SNV
	6	37277129	.	A	C	DCAF16		downstream_gene_variant	MODIFIER	ENSOARG00000000470	ENSOART00000000499	protein_coding									1510	-1	SNV
	6	37277129	.	A	C	NCAPG		intron_variant	MODIFIER	ENSOARG00000004016	ENSOART00000004369	protein_coding		1 out of 20								1	SNV
	6	37280829	rs413042851	G	A	DCAF16		upstream_gene_variant	MODIFIER	ENSOARG00000000470	ENSOART00000000499	protein_coding								rs413042851	1540	-1	SNV
	6	37280829	rs413042851	G	A	NCAPG		intron_variant	MODIFIER	ENSOARG00000004016	ENSOART00000004369	protein_coding		1 out of 20						rs413042851		1	SNV
	6	37285350	rs425673132	G	A	NCAPG		intron_variant	MODIFIER	ENSOARG00000004016	ENSOART00000004369	protein_coding		1 out of 20						rs425673132		1	SNV
	6	37285365	rs406276283	C	T	NCAPG		intron_variant	MODIFIER	ENSOARG00000004016	ENSOART00000004369	protein_coding		1 out of 20						rs406276283		1	SNV
	6	37292650	rs405875028	A	G	NCAPG		intron_variant	MODIFIER	ENSOARG00000004016	ENSOART00000004369	protein_coding		3 out of 20						rs405875028		1	SNV
	6	37296067	rs415623469	G	A	NCAPG		intron_variant	MODIFIER	ENSOARG00000004016	ENSOART00000004369	protein_coding		7 out of 20						rs415623469		1	SNV
	6	37300833	rs418284924	T	G	NCAPG		intron_variant	MODIFIER	ENSOARG00000004016	ENSOART00000004369	protein_coding		8 out of 20						rs418284924		1	SNV
	6	37302018	.	AG	A	NCAPG		intron_variant	MODIFIER	ENSOARG00000004016	ENSOART00000004369	protein_coding		9 out of 20						rs593290441		1	deletion
	6	37302029	rs412768465	G	A	NCAPG		intron_variant	MODIFIER	ENSOARG00000004016	ENSOART00000004369	protein_coding		9 out of 20						rs412768465		1	SNV
	6	37304653	rs414585388	A	C	NCAPG		intron_variant	MODIFIER	ENSOARG00000004016	ENSOART00000004369	protein_coding		11 out of 20						rs414585388		1	SNV
	6	37308727	rs159958168	C	T	NCAPG		missense_variant	MODERATE	ENSOARG00000004016	ENSOART00000004369	protein_coding	12 out of 21		1754	1754	585	S/F	tCc/tTc	rs159958168		1	SNV	deleterious(0)	Superfamily_domains:SSF48371
	6	37312563	rs401536208	C	T	NCAPG		intron_variant	MODIFIER	ENSOARG00000004016	ENSOART00000004369	protein_coding		13 out of 20						rs401536208		1	SNV
	6	37313095	rs426675084	A	G	NCAPG		intron_variant	MODIFIER	ENSOARG00000004016	ENSOART00000004369	protein_coding		13 out of 20						rs426675084		1	SNV
	6	37317017	rs401449867	T	G	NCAPG		intron_variant	MODIFIER	ENSOARG00000004016	ENSOART00000004369	protein_coding		13 out of 20						rs401449867		1	SNV
	6	37325596	rs402706998	A	G	NCAPG		intron_variant	MODIFIER	ENSOARG00000004016	ENSOART00000004369	protein_coding		14 out of 20						rs402706998		1	SNV
	6	37327064	rs398200045	C	T	NCAPG		intron_variant	MODIFIER	ENSOARG00000004016	ENSOART00000004369	protein_coding		14 out of 20						rs398200045		1	SNV
	6	37327105	rs420647929	T	C	NCAPG		intron_variant	MODIFIER	ENSOARG00000004016	ENSOART00000004369	protein_coding		14 out of 20						rs420647929		1	SNV
	6	37335729	rs159958237	C	A		orthologous to human LCORL	downstream_gene_variant	MODIFIER	ENSOARG00000000478	ENSOART00000000509	protein_coding								rs159958237	415	-1	SNV
	6	37335729	rs159958237	C	A	NCAPG		downstream_gene_variant	MODIFIER	ENSOARG00000004016	ENSOART00000004369	protein_coding								rs159958237	1878	1	SNV
	6	37335889	rs159958238	C	T		orthologous to human LCORL	downstream_gene_variant	MODIFIER	ENSOARG00000000478	ENSOART00000000509	protein_coding								rs159958238	255	-1	SNV
	6	37335889	rs159958238	C	T	NCAPG		downstream_gene_variant	MODIFIER	ENSOARG00000004016	ENSOART00000004369	protein_coding								rs159958238	2038	1	SNV
	6	37338841	rs411961316	C	T		orthologous to human LCORL	upstream_gene_variant	MODIFIER	ENSOARG00000000478	ENSOART00000000509	protein_coding								rs411961316	2566	-1	SNV
	6	37338841	rs411961316	C	T	NCAPG		downstream_gene_variant	MODIFIER	ENSOARG00000004016	ENSOART00000004369	protein_coding								rs411961316	4990	1	SNV
	6	37341190	rs411010879	G	A		orthologous to human LCORL	upstream_gene_variant	MODIFIER	ENSOARG00000000478	ENSOART00000000509	protein_coding								rs411010879	4915	-1	SNV
	6	37349103	rs424447804	G	A		orthologous to human LCORL	downstream_gene_variant	MODIFIER	ENSOARG00000004249	ENSOART00000004630	protein_coding								rs424447804	4265	-1	SNV
	6	37353566	rs414122118	C	T		orthologous to human LCORL	intron_variant	MODIFIER	ENSOARG00000004249	ENSOART00000004630	protein_coding		3 out of 3						rs414122118		-1	SNV
	6	37354145	rs414653356	A	G		orthologous to human LCORL	intron_variant	MODIFIER	ENSOARG00000004249	ENSOART00000004630	protein_coding		2 out of 3						rs414653356		-1	SNV
	6	37354915	rs426858575	G	A		orthologous to human LCORL	synonymous_variant	LOW	ENSOARG00000004249	ENSOART00000004630	protein_coding	1 out of 4		1491	1491	497	S	agC/agT	rs426858575		-1	SNV
	6	37355721	rs419074913	T	A		orthologous to human LCORL	missense_variant	MODERATE	ENSOARG00000004249	ENSOART00000004630	protein_coding	1 out of 4		685	685	229	I/L	Ata/Tta	rs419074913		-1	SNV	tolerated(0.12)
	6	37356400	rs159958380	A	T		orthologous to human LCORL	missense_variant	MODERATE	ENSOARG00000004249	ENSOART00000004630	protein_coding	1 out of 4		6	6	2	D/E	gaT/gaA	rs159958380		-1	SNV	tolerated_low_confidence(0.17)
	6	37361955	rs403285202	A	G	LCORL		downstream_gene_variant	MODIFIER	ENSOARG00000004333	ENSOART00000004722	protein_coding								rs403285202	3281	-1	SNV
	6	37388256	rs402067533	A	G	LCORL		intron_variant	MODIFIER	ENSOARG00000004333	ENSOART00000004722	protein_coding		5 out of 6						rs402067533		-1	SNV
	6	37390425	rs402538120	A	C	LCORL		intron_variant	MODIFIER	ENSOARG00000004333	ENSOART00000004722	protein_coding		5 out of 6						rs402538120		-1	SNV
	6	37396942	rs427888898	C	T	LCORL		intron_variant	MODIFIER	ENSOARG00000004333	ENSOART00000004722	protein_coding		4 out of 6						rs427888898		-1	SNV
	6	37402245	rs410568209	G	A	LCORL		intron_variant	MODIFIER	ENSOARG00000004333	ENSOART00000004722	protein_coding		4 out of 6						rs410568209		-1	SNV
	6	37405057	rs415148421	G	A	LCORL		intron_variant	MODIFIER	ENSOARG00000004333	ENSOART00000004722	protein_coding		4 out of 6						rs415148421		-1	SNV
	6	37412784	rs399176086	C	A	LCORL		intron_variant	MODIFIER	ENSOARG00000004333	ENSOART00000004722	protein_coding		4 out of 6						rs399176086		-1	SNV
	6	37416265	rs399391964	C	T	LCORL		intron_variant	MODIFIER	ENSOARG00000004333	ENSOART00000004722	protein_coding		4 out of 6						rs399391964		-1	SNV
	6	37423777	rs427016797	T	C	LCORL		intron_variant	MODIFIER	ENSOARG00000004333	ENSOART00000004722	protein_coding		4 out of 6						rs427016797		-1	SNV
	6	37424153	rs419636519	C	T	LCORL		intron_variant	MODIFIER	ENSOARG00000004333	ENSOART00000004722	protein_coding		4 out of 6						rs419636519		-1	SNV
	6	37425375	rs424308099	T	A	LCORL		intron_variant	MODIFIER	ENSOARG00000004333	ENSOART00000004722	protein_coding		4 out of 6						rs424308099		-1	SNV
	6	37433511	rs400800964	G	A	LCORL		intron_variant	MODIFIER	ENSOARG00000004333	ENSOART00000004722	protein_coding		4 out of 6						rs400800964		-1	SNV
	6	37443793	.	T	C	LCORL		intron_variant	MODIFIER	ENSOARG00000004333	ENSOART00000004722	protein_coding		2 out of 6						rs588033507		-1	SNV
	6	37449673	rs410575620	A	G	LCORL		intron_variant	MODIFIER	ENSOARG00000004333	ENSOART00000004722	protein_coding		2 out of 6						rs410575620		-1	SNV
CCR15	10	29344461	rs405972886	C	T	EE1A1		intron_variant	MODIFIER	ENSOARG00000011616	ENSOART00000012631	protein_coding		1 out of 1						rs405972886		1	SNV
10:29344224-29713193	10	29349144	rs399072781	T	C	EE1A1		intron_variant	MODIFIER	ENSOARG00000011616	ENSOART00000012631	protein_coding		1 out of 1						rs399072781		1	SNV
	10	29378793	.	C	T	EE1A1		intron_variant	MODIFIER	ENSOARG00000011616	ENSOART00000012631	protein_coding		1 out of 1						rs594255414		1	SNV
	10	29380115	rs429759773	T	C	EE1A1		intron_variant	MODIFIER	ENSOARG00000011616	ENSOART00000012631	protein_coding		1 out of 1						rs429759773		1	SNV
	10	29380561	rs410715182	T	C	EE1A1		intron_variant	MODIFIER	ENSOARG00000011616	ENSOART00000012631	protein_coding		1 out of 1						rs410715182		1	SNV
	10	29380663	rs413029773	A	G	EE1A1		intron_variant	MODIFIER	ENSOARG00000011616	ENSOART00000012631	protein_coding		1 out of 1						rs413029773		1	SNV
	10	29380742	rs426361751	A	G	EE1A1		intron_variant	MODIFIER	ENSOARG00000011616	ENSOART00000012631	protein_coding		1 out of 1						rs426361751		1	SNV
	10	29380757	rs403164495	C	T	EE1A1		intron_variant	MODIFIER	ENSOARG00000011616	ENSOART00000012631	protein_coding		1 out of 1						rs403164495		1	SNV
	10	29380801	.	C	G	EE1A1		intron_variant	MODIFIER	ENSOARG00000011616	ENSOART00000012631	protein_coding		1 out of 1						rs601841858		1	SNV
	10	29380917	rs406040351	G	A	EE1A1		intron_variant	MODIFIER	ENSOARG00000011616	ENSOART00000012631	protein_coding		1 out of 1						rs406040351		1	SNV
	10	29381716	rs430228456	G	A	EE1A1		intron_variant	MODIFIER	ENSOARG00000011616	ENSOART00000012631	protein_coding		1 out of 1						rs430228456		1	SNV
	10	29381733	rs406617664	T	C	EE1A1		intron_variant	MODIFIER	ENSOARG00000011616	ENSOART00000012631	protein_coding		1 out of 1						rs406617664		1	SNV
	10	29382002	rs399803126	T	C	EE1A1		intron_variant	MODIFIER	ENSOARG00000011616	ENSOART00000012631	protein_coding		1 out of 1						rs399803126		1	SNV
	10	29498780	rs421531355	G	T	RXFP2		intron_variant	MODIFIER	ENSOARG00000011653	ENSOART00000012678	protein_coding		3 out of 17						rs421531355		-1	SNV
CCR16	11	26554987	.	A	T	DLG4		upstream_gene_variant	MODIFIER	ENSOARG00000010397	ENSOART00000011320	protein_coding								rs599605317	71	-1	SNV
11:26512466-26939891	11	26554987	.	A	T	DLG4		intron_variant	MODIFIER	ENSOARG00000010397	ENSOART00000011316	protein_coding		1 out of 18						rs599605317		-1	SNV
	11	26561902	rs430213083	T	A	DLG4		intron_variant	MODIFIER	ENSOARG00000010397	ENSOART00000011316	protein_coding		1 out of 18						rs430213083		-1	SNV
	11	26561902	rs430213083	T	A	ACADVL		intron_variant	MODIFIER	ENSOARG00000010662	ENSOART00000011600	protein_coding		1 out of 21						rs430213083		1	SNV
